# Supplementary material
Source: HighWire-hosted journal article supplement (https://erj.ersjournals.com/content/52/1/1800475)
Supplement: inline-supplementary-material-1 [file inline-supplementary-material-1.pdf]

## ONLINE SUPPLEMENT

Section 1: Listing and brief description of other health administrative databases used (page 2)

Section 2: Table presenting the baseline characteristics of community-dwelling cohort, before and after propensity score matching (full model) (page 3)

Section 3: Additional sensitivity analyses for community-dwelling cohort (page 7)

Section 4: Results of long-term care home resident cohort analysis (page 17)

## Section 1: Listing and brief description of other health administrative databases used

- a. Canadian Institute for Health Information Discharge Abstract Database (CIHI-DAD) - contains information on all hospital admissions
- b. ICES congestive heart failure (CHF) database - contains individuals with validated physician-diagnosed CHF [1]
- c. ICES hypertension database - contains individuals with validated physician-diagnosed hypertension [2]
- d. National Ambulatory Care Reporting System - contains information on all emergency room (ER) visits
- e. Ontario Cancer Registry - a validated provincial cancer registry [3]
- f. Ontario Diabetes Database - contains individuals with validated physician-diagnosed diabetes [4]
- g. Ontario Health Insurance Plan (OHIP) database - contains information on all patient contact with physicians in both ambulatory and hospital settings
- h. Ontario Mental Health Reporting System (OMHRS) - contains information on all mental health hospital admissions
- i. Office of the Registrar General - Deaths (ORGD) - contains information on cause of death
- j. Registered Persons Database - contains demographic information and date of death (if available) of all Ontarians
- k. Same-Day Surgery database - contains information on surgical procedures not requiring overnight hospital stays

## REFERENCES:

1. Schultz SE, Rothwell DM, Chen Z, Tu K. Identifying cases of congestive heart failure from administrative data: a validation study using primary care patient records. *Chronic Dis Inj Can.* 2013; 33: 160-6.
2. Tu K, Campbell NRC, Chen Z, Cauch-Dudek KJ, McAlister FA. Accuracy of administrative databases in identifying patients with hypertension. *Open Medicine.* 2007; 1: e5-7.
3. Robles SC, Marrett LD, Clarke EA, Risch HA. An application of capture-recapture methods to the estimation of completeness of cancer registration. *J Clin Epidemiol.* 1988; 41: 495-501.
4. Hux JE, Ivis F, Flintoft V, Bica A. Diabetes in Ontario: determination of prevalence and incidence using a validated administrative data algorithm. *Diabetes Care.* 2002; 25: 512-6.

1 **Section 2: Baseline characteristics of community-dwelling cohort, before and after**  
2 **propensity score matching (full list of covariates included in the propensity score model<sup>a)</sup>)**

|                                                          | Before propensity score matching |                         |                                         | After propensity score matching |                            |                                         |
|----------------------------------------------------------|----------------------------------|-------------------------|-----------------------------------------|---------------------------------|----------------------------|-----------------------------------------|
|                                                          | New<br>SSRI/SNRI<br>users        | Non-SSRI/<br>SNRI users | Standardized<br>difference <sup>b</sup> | New<br>SSRI/SNRI<br>users       | Non-<br>SSRI/SNRI<br>users | Standardized<br>difference <sup>b</sup> |
|                                                          | N=29,835                         | N=88,776                |                                         | N=28,360                        | N=28,360                   |                                         |
| <b>Age (mean + SD)</b>                                   | 77.4 ± 7.2                       | 76.9 ± 7.5              | 0.07                                    | 77.4 ± 7.2                      | 77.5 ± 7.7                 | 0.01                                    |
|                                                          |                                  |                         |                                         |                                 |                            |                                         |
| <b>% female</b>                                          | 55.7%                            | 44.9%                   | 0.22                                    | 54.6%                           | 54.5%                      | 0.0006                                  |
|                                                          |                                  |                         |                                         |                                 |                            |                                         |
| <b>Low income as per<br/>ODB flag (%)</b>                | 24.0%                            | 20.6%                   | 0.08                                    | 23.6%                           | 23.6%                      | 0.0001                                  |
|                                                          |                                  |                         |                                         |                                 |                            |                                         |
| <b>Income quintile (%)</b>                               |                                  |                         |                                         |                                 |                            |                                         |
| 1 (lowest)                                               | 24.4%                            | 22.9%                   | 0.04                                    | 24.3%                           | 24.6%                      | 0.006                                   |
| 2                                                        | 22.1%                            | 22.1%                   | 0.0008                                  | 22.1%                           | 21.9%                      | 0.005                                   |
| 3                                                        | 19.1%                            | 19.6%                   | 0.01                                    | 19.1%                           | 19.0%                      | 0.003                                   |
| 4                                                        | 17.9%                            | 18.6%                   | 0.02                                    | 18.1%                           | 18.1%                      | 0.0005                                  |
| 5 (highest)                                              | 16.1%                            | 16.4%                   | 0.01                                    | 16.1%                           | 16.2%                      | 0.002                                   |
| Missing data                                             | 0.4%                             | 0.4%                    | 0.005                                   | 0.4%                            | 0.4%                       | 0.001                                   |
|                                                          |                                  |                         |                                         |                                 |                            |                                         |
| <b>% rural setting</b>                                   | 17.2%                            | 16.9%                   | 0.008                                   | 17.1%                           | 17.3%                      | 0.003                                   |
|                                                          |                                  |                         |                                         |                                 |                            |                                         |
| <b>COPD exacerbation<br/>frequency past year<br/>(%)</b> |                                  |                         |                                         |                                 |                            |                                         |
| 0                                                        | 58.1%                            | 61.5%                   | 0.07                                    | 58.6%                           | 58.6%                      | 0                                       |
| >=1 outpatient<br>exacerbation                           | 17.2%                            | 18.5%                   | 0.03                                    | 17.1%                           | 17.1%                      | 0                                       |
| >=1 exacerbation<br>requiring hospital<br>presentation   | 24.7%                            | 20.0%                   | 0.11                                    | 24.2%                           | 24.2%                      | 0                                       |
|                                                          |                                  |                         |                                         |                                 |                            |                                         |
| <b>COPD exacerbation<br/>in the past 30 days<br/>(%)</b> | 9.9%                             | 10.9%                   | 0.03                                    | 10.0%                           | 9.8%                       | 0.004                                   |
|                                                          |                                  |                         |                                         |                                 |                            |                                         |
| <b>Duration of COPD<br/>year prior (%)</b>               |                                  |                         |                                         |                                 |                            |                                         |
| < 2 years                                                | 20.8%                            | 32.6%                   | 0.27                                    | 21.7%                           | 22.1%                      | 0.009                                   |
| 2-5 years                                                | 18.6%                            | 17.4%                   | 0.03                                    | 18.8%                           | 18.5%                      | 0.006                                   |
| > 5 years                                                | 60.6%                            | 50.0%                   | 0.21                                    | 59.5%                           | 59.4%                      | 0.003                                   |
|                                                          |                                  |                         |                                         |                                 |                            |                                         |

| Table continued from previous page                                         |                                  |                         |                                         |                                 |                            |                                         |
|----------------------------------------------------------------------------|----------------------------------|-------------------------|-----------------------------------------|---------------------------------|----------------------------|-----------------------------------------|
|                                                                            | Before propensity score matching |                         |                                         | After propensity score matching |                            |                                         |
|                                                                            | New<br>SSRI/SNRI<br>users        | Non-SSRI/<br>SNRI users | Standardized<br>difference <sup>b</sup> | New<br>SSRI/SNRI<br>users       | Non-<br>SSRI/SNRI<br>users | Standardized<br>difference <sup>b</sup> |
|                                                                            | N=29,835                         | N=88,776                |                                         | N=28,360                        | N=28,360                   |                                         |
| <b>Respiratory medications in the past 6 months (%)</b>                    |                                  |                         |                                         |                                 |                            |                                         |
| Short/long-acting beta agonists                                            | 40.3%                            | 36.4%                   | 0.08                                    | 39.7%                           | 39.4%                      | 0.007                                   |
| Short/long-acting anticholinergics                                         | 41.2%                            | 39.2%                   | 0.04                                    | 40.8%                           | 40.8%                      | 0.0003                                  |
| Inhaled corticosteroids                                                    | 12.3%                            | 12.1%                   | 0.006                                   | 12.3%                           | 12.3%                      | 0.002                                   |
| Combination inhaled corticosteroid-long acting beta agonist inhalers       | 36.4%                            | 33.2%                   | 0.07                                    | 35.9%                           | 35.8%                      | 0.002                                   |
| Oral corticosteroids                                                       | 17.8%                            | 13.9%                   | 0.11                                    | 17.3%                           | 17.1%                      | 0.003                                   |
| Theophylline                                                               | 2.2%                             | 1.8%                    | 0.03                                    | 2.2%                            | 2.2%                       | 0.003                                   |
| Respiratory antibiotics                                                    | 48.1%                            | 44.3%                   | 0.08                                    | 47.5%                           | 47.5%                      | 0.0003                                  |
|                                                                            |                                  |                         |                                         |                                 |                            |                                         |
| <b>Total number of outpatient visits in the past 12 months (mean + SD)</b> | 16.2 ± 11.6                      | 13.9 ± 10.0             | 0.21                                    | 15.9 ± 11.5                     | 15.9 ± 10.9                | 0.0003                                  |
|                                                                            |                                  |                         |                                         |                                 |                            |                                         |
| <b>Total number of hospitalizations in the past 12 months (mean + SD)</b>  | 0.7 ± 1.1                        | 0.5 ± 0.9               | 0.20                                    | 0.6 ± 1.1                       | 0.6 ± 1.1                  | 0.005                                   |
|                                                                            |                                  |                         |                                         |                                 |                            |                                         |
| <b>Any ICU admission in the past 12 months (%)</b>                         | 9.9%                             | 7.5%                    | 0.08                                    | 9.6%                            | 9.6%                       | 0.0002                                  |
|                                                                            |                                  |                         |                                         |                                 |                            |                                         |
| <b>Any surgery in the past 12 months (%)</b>                               | 10.3%                            | 9.1%                    | 0.04                                    | 10.0%                           | 10.0%                      | 0.0007                                  |
|                                                                            |                                  |                         |                                         |                                 |                            |                                         |
| <b>Johns Hopkins Adjusted Clinical Group<sup>c</sup> (%)</b>               |                                  |                         |                                         |                                 |                            |                                         |
| Bottom tertile                                                             | 27.2%                            | 39.2%                   | 0.26                                    | 28.2%                           | 28.0%                      | 0.004                                   |
| Middle tertile                                                             | 27.5%                            | 29.2%                   | 0.04                                    | 27.8%                           | 27.9%                      | 0.001                                   |
| Top tertile                                                                | 45.3%                            | 31.5%                   | 0.29                                    | 44.0%                           | 44.1%                      | 0.003                                   |
|                                                                            |                                  |                         |                                         |                                 |                            |                                         |

| Table continued from previous page                                                                                               |                                       |                                     |                                         |                                       |                                        |                                         |
|----------------------------------------------------------------------------------------------------------------------------------|---------------------------------------|-------------------------------------|-----------------------------------------|---------------------------------------|----------------------------------------|-----------------------------------------|
|                                                                                                                                  | Before propensity score matching      |                                     |                                         | After propensity score matching       |                                        |                                         |
|                                                                                                                                  | New<br>SSRI/SNRI<br>users<br>N=29,835 | Non-SSRI/<br>SNRI users<br>N=88,776 | Standardized<br>difference <sup>b</sup> | New<br>SSRI/SNRI<br>users<br>N=28,360 | Non-<br>SSRI/SNRI<br>users<br>N=28,360 | Standardized<br>difference <sup>b</sup> |
| <b>Non-COPD<br/>pulmonary disease<sup>d</sup><br/>(%)</b>                                                                        | 50.5%                                 | 46.9%                               | 0.07                                    | 50.2%                                 | 50.0%                                  | 0.004                                   |
|                                                                                                                                  |                                       |                                     |                                         |                                       |                                        |                                         |
| <b>Ischemic heart<br/>disease<sup>d</sup> (%)</b>                                                                                | 35.7%                                 | 33.5%                               | 0.05                                    | 35.4%                                 | 35.7%                                  | 0.005                                   |
|                                                                                                                                  |                                       |                                     |                                         |                                       |                                        |                                         |
| <b>Congestive heart<br/>failure<sup>d</sup> (%)</b>                                                                              | 30.0%                                 | 27.5%                               | 0.06                                    | 29.8%                                 | 30.3%                                  | 0.01                                    |
|                                                                                                                                  |                                       |                                     |                                         |                                       |                                        |                                         |
| <b>ER<br/>visit/hospitalization<br/>for ischemic heart<br/>disease or congestive<br/>heart failure in the<br/>year prior (%)</b> | 16.5%                                 | 13.1%                               | 0.09                                    | 16.1%                                 | 16.1%                                  | 0.002                                   |
|                                                                                                                                  |                                       |                                     |                                         |                                       |                                        |                                         |
| <b>Hypertension<sup>d</sup> (%)</b>                                                                                              | 81.2%                                 | 78.8%                               | 0.06                                    | 81.1%                                 | 81.2%                                  | 0.005                                   |
|                                                                                                                                  |                                       |                                     |                                         |                                       |                                        |                                         |
| <b>Atherosclerosis<sup>d</sup> (%)</b>                                                                                           | 7.7%                                  | 7.4%                                | 0.01                                    | 7.7%                                  | 7.7%                                   | 0.002                                   |
|                                                                                                                                  |                                       |                                     |                                         |                                       |                                        |                                         |
| <b>Diabetes<sup>d</sup> (%)</b>                                                                                                  | 34.8%                                 | 33.7%                               | 0.02                                    | 34.7%                                 | 35.3%                                  | 0.01                                    |
|                                                                                                                                  |                                       |                                     |                                         |                                       |                                        |                                         |
| <b>Previous stroke and<br/>cerebrovascular<br/>disease<sup>d</sup> (%)</b>                                                       | 15.6%                                 | 11.4%                               | 0.13                                    | 15.1%                                 | 15.2%                                  | 0.001                                   |
|                                                                                                                                  |                                       |                                     |                                         |                                       |                                        |                                         |
| <b>Cancer<sup>d</sup> (%)</b>                                                                                                    | 23.3%                                 | 24.9%                               | 0.04                                    | 23.5%                                 | 23.7%                                  | 0.004                                   |
|                                                                                                                                  |                                       |                                     |                                         |                                       |                                        |                                         |
| <b>Musculoskeletal or<br/>connective tissue<br/>disease<sup>d</sup> (%)</b>                                                      | 93.4%                                 | 89.6%                               | 0.14                                    | 93.2%                                 | 93.2%                                  | 0.001                                   |
|                                                                                                                                  |                                       |                                     |                                         |                                       |                                        |                                         |
| <b>Osteoporosis<sup>d</sup> (%)</b>                                                                                              | 17.1%                                 | 14.7%                               | 0.06                                    | 16.9%                                 | 16.8%                                  | 0.004                                   |
|                                                                                                                                  |                                       |                                     |                                         |                                       |                                        |                                         |
| <b>Psychotic psychiatric<br/>disease<sup>d,e</sup> (%)</b>                                                                       | 9.5%                                  | 4.2%                                | 0.21                                    | 8.5%                                  | 8.4%                                   | 0.005                                   |
|                                                                                                                                  |                                       |                                     |                                         |                                       |                                        |                                         |
| <b>Non-psychotic<br/>psychiatric disease<sup>d,f</sup><br/>(%)</b>                                                               | 75.9%                                 | 42.9%                               | 0.71                                    | 74.7%                                 | 74.8%                                  | 0.004                                   |

| Table continued from previous page                                                                                                                                                                                                                      |                                  |                         |                                         |                                 |                            |                                         |
|---------------------------------------------------------------------------------------------------------------------------------------------------------------------------------------------------------------------------------------------------------|----------------------------------|-------------------------|-----------------------------------------|---------------------------------|----------------------------|-----------------------------------------|
|                                                                                                                                                                                                                                                         | Before propensity score matching |                         |                                         | After propensity score matching |                            |                                         |
|                                                                                                                                                                                                                                                         | New<br>SSRI/SNRI<br>users        | Non-SSRI/<br>SNRI users | Standardized<br>difference <sup>b</sup> | New<br>SSRI/SNRI<br>users       | Non-<br>SSRI/SNRI<br>users | Standardized<br>difference <sup>b</sup> |
|                                                                                                                                                                                                                                                         | N=29,835                         | N=88,776                |                                         | N=28,360                        | N=28,360                   |                                         |
| <b>Sleep disorder<sup>d</sup> (%)</b>                                                                                                                                                                                                                   | 60.1%                            | 55.1%                   | 0.10                                    | 59.9%                           | 60.1%                      | 0.004                                   |
|                                                                                                                                                                                                                                                         |                                  |                         |                                         |                                 |                            |                                         |
| <b>Total number of non-SSRI/SNRI drugs received in the past year (mean + SD)</b>                                                                                                                                                                        | 13.8 ± 6.8                       | 11.4 ± 6.1              | 0.37                                    | 13.5 ± 6.6                      | 13.5 ± 6.6                 | 0.004                                   |
|                                                                                                                                                                                                                                                         |                                  |                         |                                         |                                 |                            |                                         |
| <b>Benzodiazepine in the past 6 months (%)</b>                                                                                                                                                                                                          | 38.3%                            | 17.9%                   | 0.47                                    | 35.6%                           | 35.4%                      | 0.004                                   |
|                                                                                                                                                                                                                                                         |                                  |                         |                                         |                                 |                            |                                         |
| <b>Oral/transdermal opioid in the past 6 months (%)</b>                                                                                                                                                                                                 | 35.1%                            | 22.5%                   | 0.28                                    | 33.3%                           | 33.1%                      | 0.004                                   |
|                                                                                                                                                                                                                                                         |                                  |                         |                                         |                                 |                            |                                         |
| <b>Smoking cessation drug<sup>g</sup> in the past 12 months (%)</b>                                                                                                                                                                                     | 2.9%                             | 1.7%                    | 0.08                                    | 2.6%                            | 2.5%                       | 0.007                                   |
|                                                                                                                                                                                                                                                         |                                  |                         |                                         |                                 |                            |                                         |
| <b>Spirometry in the past 12 months (%)</b>                                                                                                                                                                                                             | 26.7%                            | 28.5%                   | 0.04                                    | 26.8%                           | 26.5%                      | 0.005                                   |
|                                                                                                                                                                                                                                                         |                                  |                         |                                         |                                 |                            |                                         |
| <b>% cohort entry in flu season<sup>h</sup></b>                                                                                                                                                                                                         | 38.5%                            | 37.0%                   | 0.03                                    | 38.2%                           | 38.2%                      | 0.0004                                  |
| ER = emergency room; ODB = Ontario Drug Benefit; SD = standard deviation                                                                                                                                                                                |                                  |                         |                                         |                                 |                            |                                         |
| <sup>a</sup> An abridged version of this table is found in the manuscript proper.                                                                                                                                                                       |                                  |                         |                                         |                                 |                            |                                         |
| <sup>b</sup> Standardized differences of > 0.10 are thought to indicate potentially meaningful differences.                                                                                                                                             |                                  |                         |                                         |                                 |                            |                                         |
| <sup>c</sup> This is a measure of patient morbidity burden, using hospitalization and ambulatory visit data based on a 2-year look-back from the index date. The Johns Hopkins ACG(r) System Ver XX.                                                    |                                  |                         |                                         |                                 |                            |                                         |
| <sup>d</sup> Presence of comorbidities was based on 5-year look-back from the index date.                                                                                                                                                               |                                  |                         |                                         |                                 |                            |                                         |
| <sup>e</sup> Includes schizophrenia, bipolar disorder and paranoid states.                                                                                                                                                                              |                                  |                         |                                         |                                 |                            |                                         |
| <sup>f</sup> Includes depression disorders, anxiety disorders, phobias, stress disorders, dissociative and somatization disorders, eating disorders, personality disorders, mental and behavioural disorders due to substance abuse, and tic disorders. |                                  |                         |                                         |                                 |                            |                                         |
| <sup>g</sup> Includes Wellbutrin and Varenicline.                                                                                                                                                                                                       |                                  |                         |                                         |                                 |                            |                                         |
| <sup>h</sup> Defined as November 1 to March 31.                                                                                                                                                                                                         |                                  |                         |                                         |                                 |                            |                                         |

1

2

3

4

### **Section 3: Additional sensitivity analyses for community-dwelling cohort**

#### **Methods for additional sensitivity analyses**

Several additional sensitivity analyses were performed. First, we evaluated our outcomes distinguishing by whether a new SSRI or a new SNRI drug was received. The purpose of this analysis was to examine for possible drug class effects, since SSRI and SNRI drugs have differing neurotransmitter reuptake selectivities [1] and these differences may influence respiratory outcome risk. For example, SSRI drugs have more serotonin reuptake selectivity than SNRI drugs [1] and serotonin has been linked to reduced apoptotic cells clearance [2], which may in turn increase airway tract inflammation and plugging, and thereby, chances for respiratory tract infection [3].

Second, among individuals receiving citalopram (which was found to be the most commonly dispensed SSRI/SNRI, received by 35.2% of community-dwelling new SSRI/SNRI users and 48.0% of long term care resident new SSRI/SNRI users), we evaluated our outcomes by citalopram daily dose to examine for a possible dose-response relationship and to determine if adverse event risk possibly extended to 'lower dose' levels. We limited this sensitivity analysis to citalopram users, since this was the most commonly dispensed SSRI/SNRI drug and since it was not possible to convert the eight different SSRI/SNRI drugs covered by the Ontario Drug Benefit (ODB) program into 'milligram equivalents' of a single drug formulation. We considered two different citalopram dose levels: <20 mg/day (lower dose) and ≥20 mg/day (higher dose). A threshold of 20 mg/day was chosen to distinguish 'lower' versus 'higher' citalopram daily dose levels, since the number of drug recipients was roughly evenly split above and below this threshold.

We previously reported that, among older adults with COPD, new use of another psychoactive medication class (benzodiazepine agonists) was associated with increased risk for adverse respiratory events [4]. Therefore, we performed a final sensitivity analysis where we evaluated our outcomes among new SSRI/SNRI drug users, but with the control group limited to new benzodiazepine users, in order to compare the respiratory safety profile of SSRI/SNRI drugs to benzodiazepines. New benzodiazepine use was defined as a dispensing for a benzodiazepine drug, with no benzodiazepine drug receipt in the year prior. For this sensitivity analysis, we excluded concomitant benzodiazepine users from the exposed group and concomitant SSRI/SNRI users from the control group, in order to minimize group contamination. Using a similar approach as previous [5], we defined concomitant use of either drug as receipt of the respective drug within 90 days prior to the index date. The propensity score was re-estimated for this specific sensitivity analysis, since a new control definition was used.

A final sensitivity analysis was performed where we evaluated our outcomes among new SSRI/SNRI drug users, but with the control group limited to new tricyclic antidepressant users. Tricyclic antidepressants, like SSRI/SNRI drugs, have serotonergic reuptake activity (albeit weaker) and the purpose of this sensitivity analysis was to examine whether risk of adverse respiratory events would be higher with receipt of the more serotonergic SSRI/SNRI drugs. New tricyclic antidepressant use was defined as a dispensing for a tricyclic antidepressant, with no tricyclic antidepressant drug receipt in the year prior. For this sensitivity analysis, we excluded concomitant tricyclic antidepressant users from the exposed group and concomitant SSRI/SNRI users from the control group, in order to minimize group contamination. Using a similar approach as previous [5], we defined concomitant use of either drug as receipt of the respective drug within 90 days prior to the index date. Because we observed that there were more exposed



than control individuals in this sensitivity analysis, we elected to balance the two groups on measured covariates using inverse probability of treatment weighting (IPTW) using the propensity score [6-7] (rather than using propensity score matching methods), in order to minimize loss of exposed individuals.

## **Results and discussion of additional sensitivity analyses**

**By SSRI versus SNRI drug class.** Individuals receiving a new SSRI drug versus controls had significantly increased rates of hospital admission for COPD or pneumonia (HR 1.20; 95% CI 1.09-1.32), ER visits for COPD or pneumonia (HR 1.14; 95% CI 1.03-1.27), COPD or pneumonia-related mortality (HR 1.35; 95% CI 1.08-1.69) and all-cause mortality (HR 1.26; 95% CI 1.16-1.38), but significantly decreased rate of outpatient exacerbation (HR 0.90; 95% CI 0.85-0.96) (Table 1 in this section). There were no significant associations observed between new SNRI drug receipt and any of our outcomes. While these results suggest that it is drugs with greater serotonin reuptake selectivity that predispose to increased risk for adverse respiratory outcomes, the SNRI user subgroup may have been under-powered to detect for potentially significant results, as far fewer individuals in the exposed group received SNRI drugs versus SSRI drugs (SNRI recipients comprised 20.9% of new SSRI/SNRI drug users in the community-dwelling cohort).

**By citalopram daily dose category.** Individuals receiving lower daily doses of citalopram compared to controls had significantly increased rates of hospital admission for COPD or pneumonia (HR 1.45; 95% CI 1.20-1.74), COPD or pneumonia-related mortality (HR 2.31; 95% CI 1.40-3.81) and all-cause mortality (HR 1.48; 95% CI 1.26-1.75) (Table 2 in this

section). Significantly increased rate of all-cause mortality was observed among individuals receiving higher daily doses of citalopram compared to controls (HR 1.25; 95% CI 1.04-1.51). No other significant associations were observed in either group. The fact that increased rates of adverse respiratory outcomes were observed among individuals receiving lower daily doses of citalopram indicates that potential respiratory safety concerns regarding SSRI/SNRI drug use in COPD extend to lower drug dose levels. The finding of a greater number of 'positive results' in the lower versus higher daily citalopram dose category, and the finding of a higher HR for all-cause mortality in the lower versus higher daily citalopram dose group, suggests residual confounding may be effecting the results. However, the aforementioned findings may also reflect that our drug dose categorization was not fully accurate. A minority of individuals in both drug dose groups were simultaneously receiving more than one SSRI/SNRI drug, and this occurred more frequently in the lower (6.6%) versus higher (3.0%) citalopram dose group. It was not possible to convert other concomitant SSRI/SNRI drug use, when present, into 'citalopram milligram equivalents' and this limitation results in some degree of drug dose categorization inaccuracy.

**With new benzodiazepine users serving as controls.** Compared to new benzodiazepine users, new SSRI/SNRI users had significantly decreased rates of outpatient exacerbation (HR 0.82; 95% CI 0.76-0.89), COPD or pneumonia-related mortality (HR 0.75; 95% CI 0.59-0.94) and all-cause mortality (HR 0.75; 95% CI 0.68-0.82) (Table 3 in this section). No other significant associations were found. Although both new SSRI/SNRI drug use and new benzodiazepine drug use [4] are independently associated with increased adverse respiratory risk when compared to new, but non-specific, drug receipt in the older adult COPD population, the

results of this sensitivity analysis suggest that benzodiazepine drugs predispose to greater adverse respiratory risk than SSRI/SNRI drugs when compared head-to-head.

**With new tricyclic antidepressant users serving as controls.** Compared to new tricyclic antidepressant users, new SSRI/SNRI users had significantly increased rates of hospital admission for COPD or pneumonia (HR 1.18; 95% CI 1.03-1.37), COPD or pneumonia-related mortality (HR 1.57; 95% CI 1.07-1.29) and all-cause mortality (HR 1.39; 95% CI 1.22-1.59) (Table 4 in this section). No other significant associations were found. These findings suggest that it is the serotonergic activity of SSRI/SNRI drugs (which is present to a greater degree in these medications compared to tricyclic antidepressants) that is responsible for increased risk of adverse respiratory outcomes.

## REFERENCES

1. Dolder C, Nelson M, Stump A. Pharmacological and clinical profile of newer antidepressants: implications for the treatment of elderly patients. *Drugs Aging*. 2010; 27: 625-40.
2. Tanaka T, Doe JM, Horstmann SA, et al. Neuroendocrine signaling via the serotonin transporter regulates clearance of apoptotic cells. *J Biol Chem*. 2014; 289: 10466-75.
3. Vandivier RW, Henson PM, Douglas IS. Burying the dead: the impact of failed apoptotic cell removal (efferocytosis) on chronic inflammatory lung disease. *Chest*. 2006; 129: 1673–1682.
4. Vozoris NT, Fischer HD, Wang X, et al. Benzodiazepine drug use and adverse respiratory outcomes among older adults with COPD. *Eur Respir J*. 2014; 44: 332–340.
5. Vozoris NT, Wang X, Austin PC, et al. Incident diuretic drug use and adverse respiratory events among older adults with chronic obstructive pulmonary disease. *Br J Clin Pharmacol*. 2018; 84: 579-589.
6. Austin PC. An Introduction to Propensity Score Methods for Reducing the Effects of Confounding in Observational Studies. *Multivariate Behav Res*. 2011; 46: 399-424.

- 1 7. Austin PC, Stuart EA. Moving towards best practice when using inverse probability of
- 2 treatment weighting (IPTW) using the propensity score to estimate causal treatment effects in
- 3 observational studies. *Stat Med.* 2015; 34: 3661-79.

**Table 1. Hazard ratios and confidence intervals for outcomes in the community-dwelling propensity matched cohort, distinguishing by SSRI/SNRI drug type received**

| SSRI/SNRI drug type received | SSRI/SNRI status | Outpatient exacerbation |                          | ER visit outcome |                        | Hospital admission outcome |                          | ICU outcome |                        | COPD or pneumonia-related mortality |                         | All-cause mortality |                           |
|------------------------------|------------------|-------------------------|--------------------------|------------------|------------------------|----------------------------|--------------------------|-------------|------------------------|-------------------------------------|-------------------------|---------------------|---------------------------|
|                              |                  | N (%)                   | HR (95% CI, p-value)     | N (%)            | HR (95% CI, p-value)   | N (%)                      | HR (95% CI, p-value)     | N (%)       | HR (95% CI, p-value)   | N (%)                               | HR (95% CI, p-value)    | N (%)               | HR (95% CI, p-value)      |
| SSRI drugs                   | New users        | 1903 (8.5%)             | 0.90 (0.85-0.96), 0.0009 | 737 (3.3%)       | 1.14 (1.03-1.27), 0.01 | 922 (4.1%)                 | 1.20 (1.09-1.32), 0.0001 | 131 (0.6%)  | 1.15 (0.89-1.48), 0.28 | 178 (0.8%)                          | 1.35 (1.08-1.69), 0.009 | 1163 (5.2%)         | 1.26 (1.16-1.38), <0.0001 |
|                              | Non- users       | 2088 (9.3%)             |                          | 645 (2.9%)       |                        | 769 (3.4%)                 |                          | 114 (0.5%)  |                        | 133 (0.6%)                          |                         | 929 (4.1%)          |                           |
|                              |                  |                         |                          |                  |                        |                            |                          |             |                        |                                     |                         |                     |                           |
| SNRI drugs                   | New users        | 505 (8.6%)              | 0.94 (0.84-1.06), 0.33   | 181 (3.1%)       | 1.08 (0.88-1.33), 0.47 | 183 (3.1%)                 | 0.93 (0.76-1.12), 0.44   | 23 (0.4%)   | 0.77 (0.44-1.32), 0.34 | 26 (0.4%)                           | 0.87 (0.51-1.47), 0.60  | 193 (3.3%)          | 0.91 (0.75-1.11), 0.35    |
|                              | Non- users       | 531 (9.0%)              |                          | 168 (2.8%)       |                        | 197 (3.3%)                 |                          | 30 (0.5%)   |                        | 30 (0.5%)                           |                         | 212 (3.6%)          |                           |

**Table 2. Hazard ratios and confidence intervals for outcomes in the community-dwelling propensity matched cohort, distinguishing by citalopram daily dose**

| Citalopram daily dose               | SSRI/SNRI status | Outpatient exacerbation |                        | ER visit for COPD or pneumonia |                        | Hospital admission COPD or pneumonia |                          | ICU admission during a hospitalization for COPD or pneumonia |                        | COPD or pneumonia-related mortality |                         | All-cause mortality |                           |
|-------------------------------------|------------------|-------------------------|------------------------|--------------------------------|------------------------|--------------------------------------|--------------------------|--------------------------------------------------------------|------------------------|-------------------------------------|-------------------------|---------------------|---------------------------|
|                                     |                  | N (%)                   | HR (95% CI), p-value   | N (%)                          | HR (95% CI), p-value   | N (%)                                | HR (95% CI), p-value     | N (%)                                                        | HR (95% CI), p-value   | N (%)                               | HR (95% CI), p-value    | N (%)               | HR (95% CI), p-value      |
| <b>Lower dose (&lt; 20 mg/day)</b>  | New users        | 449 (8.4%)              | 0.93 (0.82-1.06), 0.29 | 175 (3.3%)                     | 1.08 (0.88-1.33), 0.47 | 267 (5.0%)                           | 1.45 (1.20-1.74), 0.0001 | 25 (0.5%)                                                    | 0.78 (0.46-1.32), 0.35 | 50 (0.9%)                           | 2.31 (1.40-3.81), 0.001 | 335 (6.3%)          | 1.48 (1.26-1.75), <0.0001 |
|                                     | Non-users        | 477 (8.9%)              |                        | 162 (3.0%)                     |                        | 186 (3.5%)                           |                          | 32 (0.6%)                                                    |                        | 22 (0.4%)                           |                         | 229 (4.3%)          |                           |
| <b>Higher dose (&gt;=20 mg/day)</b> | New users        | 380 (8.2%)              | 0.93 (0.81-1.07), 0.30 | 146 (3.1%)                     | 1.01 (0.80-1.26), 0.95 | 184 (4.0%)                           | 1.14 (0.93-1.40), 0.20   | 31 (0.7%)                                                    | 1.41(0.82-2.44), 0.22  | 33 (0.7%)                           | 0.83 (0.52-1.32), 0.44  | 246 (5.3%)          | 1.25 (1.04-1.51), 0.02    |
|                                     | Non-users        | 406 (8.7%)              |                        | 145 (3.1%)                     |                        | 162 (3.5%)                           |                          | 22 (0.5%)                                                    |                        | 40 (0.9%)                           |                         | 198 (4.3%)          |                           |

**Table 3. Hazard ratios and confidence intervals for outcomes in the community-dwelling propensity matched cohort, where the control group was new benzodiazepine drug users**

| Outcomes                                                            | Status of SSRI/SNRI use  | Number of events (%) | HR (95% CI, p-value)      |
|---------------------------------------------------------------------|--------------------------|----------------------|---------------------------|
| <b>Outpatient respiratory exacerbation</b>                          | New SSRI or SNRI users   | 1175(7.8%)           | 0.82 (0.76-0.89), <0.0001 |
|                                                                     | New benzodiazepine users | 1410(9.4%)           | referent                  |
|                                                                     |                          |                      |                           |
| <b>ER visit for COPD or pneumonia</b>                               | New SSRI or SNRI users   | 449(3.0%)            | 0.91 (0.80-1.03), 0.13    |
|                                                                     | New benzodiazepine users | 495(3.3%)            | referent                  |
|                                                                     |                          |                      |                           |
| <b>Hospital admissions COPD or pneumonia</b>                        | New SSRI or SNRI users   | 579(3.9%)            | 1.01 (0.90-1.13), 0.86    |
|                                                                     | New benzodiazepine users | 573(3.8%)            | referent                  |
|                                                                     |                          |                      |                           |
| <b>ICU admission during a hospitalization for COPD or pneumonia</b> | New SSRI or SNRI users   | 76(0.5%)             | 0.96 (0.70-1.32), 0.81    |
|                                                                     | New benzodiazepine users | 79(0.5%)             | referent                  |
|                                                                     |                          |                      |                           |
| <b>COPD/pneumonia-related mortality</b>                             | New SSRI or SNRI users   | 118(0.8%)            | 0.75 (0.59-0.94), 0.01    |
|                                                                     | New benzodiazepine users | 156(1.0%)            | referent                  |
|                                                                     |                          |                      |                           |
| <b>All-cause mortality</b>                                          | New SSRI or SNRI users   | 798(5.3%)            | 0.75 (0.68-0.82), <0.0001 |
|                                                                     | New benzodiazepine users | 1054(7.0%)           | referent                  |

**Table 4. Hazard ratios and confidence intervals for outcomes in the community-dwelling propensity matched cohort, where the control group was tricyclic antidepressant drug users**

| Outcomes                                                            | Status of SSRI/SNRI use | Number of events (%) | HR (95% CI, p-value)     |
|---------------------------------------------------------------------|-------------------------|----------------------|--------------------------|
| <b>Outpatient respiratory exacerbation</b>                          | New SSRI or SNRI users  | 2121 (8.4%)          | 0.93 (0.86-1.01, 0.10)   |
|                                                                     | New tricyclic users     | 1047 (9.0%)          | referent                 |
| <b>ER visit for COPD or pneumonia</b>                               | New SSRI or SNRI users  | 793 (3.1%)           | 1.00 (0.87-1.16, 0.99)   |
|                                                                     | New tricyclic users     | 366 (3.1%)           | referent                 |
| <b>Hospital admissions COPD or pneumonia</b>                        | New SSRI or SNRI users  | 965 (3.8%)           | 1.18 (1.03-1.37, 0.02)   |
|                                                                     | New tricyclic users     | 378 (3.2%)           | referent                 |
| <b>ICU admission during a hospitalization for COPD or pneumonia</b> | New SSRI or SNRI users  | 140 (0.6%)           | 1.22 (0.84-1.77, 0.30)   |
|                                                                     | New tricyclic users     | 53 (0.5%)            | referent                 |
| <b>COPD or pneumonia-related mortality</b>                          | New SSRI or SNRI users  | 186 (0.7%)           | 1.57 (1.07-2.29, 0.02)   |
|                                                                     | New tricyclic users     | 55 (0.5%)            | referent                 |
| <b>All-cause mortality</b>                                          | New SSRI or SNRI users  | 1274 (5.1%)          | 1.39 (1.22-1.59, <0.001) |
|                                                                     | New tricyclic users     | 426 (3.7%)           | referent                 |



## **Section 4: Results of long-term care home resident cohort analysis**

### **Overall cohort results**

Between April 1, 2008 and December 31, 2013, 13,107 long-term care home residents with COPD were identified and 6231 (47.5%) of them were new SSRI/SNRI users (Figure 1 in this section). After propensity score matching, 5053 new users were matched to an equivalent number of controls. No matched control was found for 1178 (18.9%) of new SSRI/SNRI users. New users and controls were well-balanced on baseline characteristics, with standardized differences being below 10% for all variables (Table 1 in this section).

Compared to controls, new SSRI/SNRI users had significantly higher rates of COPD or pneumonia-related mortality (ARD 0.09%; HR 1.42, 95% CI 1.13-1.80; NNH 111) and all-cause mortality (ARD 4.5%; HR 1.32, 95% CI 1.19-1.46; NNH 22), but decreased significantly decreased rate of outpatient exacerbation (HR 0.84; 95% CI 0.72-0.97) (Table 2 in this section). No other significant associations were observed. These results are similar to the community-dwelling cohort, with the exception that in the community-dwelling cohort significantly increased rates of hospital admission for COPD or pneumonia and ER visits for COPD or pneumonia were also found. The aforementioned differences between the two cohorts may be explained by the fact that far fewer long-term care home residents were available for analysis (13,107 long-term care residents versus 118,611 community-dwelling individuals) and more SSRI/SNRI users went entirely unmatched in the long-term care home resident cohort (18.9% in long-term care versus 4.9% in the community). In addition, patterns of hospital referral may be different for long-term care residents as compared to community-dwelling older adults. For example, long-term care residents with COPD may receive care on-site within the nursing home

setting for COPD or pneumonia, thereby potentially resulting in fewer ER visits and hospitalizations for these conditions than would be seen with community-dwelling individuals with similar conditions. This difference helps to justify the approach used in this study, where community-dwelling older adults and long-term care residents were examined separately.

## Sensitivity analyses

**By COPD exacerbation frequency.** In the subgroup of individuals with no exacerbation in the year prior to index, new versus non-users had significantly decreased rates of outpatient exacerbations (HR 0.75; 95% 0.58-0.98) (Table 3 in this section). In the subgroup of individuals with  $\geq 1$  exacerbation requiring hospitalization in the year prior to index, significantly lower rates of ER visits for COPD or pneumonia was found among new versus non-users (HR 0.61; 95% 0.38-0.99). A significantly increased rate of COPD or pneumonia-related mortality was observed among new versus non-users in the subgroup with  $\geq 1$  outpatient respiratory exacerbation in the year prior to index (HR 2.82; 95% CI 1.18-6.77). There were significantly increased rates of all-cause mortality among new versus non-users across all COPD exacerbation frequency subgroups (no exacerbations in the year prior to index: HR 1.31; 95% CI 1.14-1.50;  $\geq 1$  outpatient respiratory exacerbation in the year prior to index: HR 1.96; 95% CI 1.35-2.86;  $\geq 1$  exacerbation requiring hospitalization in the year prior to index: HR 1.23; 95% CI 1.03-1.46). No other associations were statistically significant. A fairly similar pattern of results was seen in the community-dwelling cohort.

**By previously diagnosed psychiatric disease.** In the subgroup of individuals without pre-existing psychiatric disease, there were significantly increased rates of COPD or pneumonia-

related mortality (HR 1.68; 95% CI 1.17-2.42) and all-cause mortality (HR 1.45; 95% CI 1.24-1.71) among new users compared to controls (Table 4 in this section). In the subgroup of individuals with pre-existing psychiatric disease, new users compared to controls had significantly lower rate of outpatient exacerbation (HR 0.80; 95% CI 0.67-0.97), but significantly higher all-cause mortality rate (HR 1.23; 95% CI 1.08-1.41). There were no other significant associations observed. While increased mortality risk associated with SSRI/SNRI drug use was found among individuals without pre-existing psychiatric disease in both the community-dwelling and long-term care home resident cohorts, this finding was observed to extend to those with pre-existing psychiatric disease among long-term care home residents.

**By SSRI versus SNRI drug class.** Individuals receiving a new SSRI drug versus controls had significantly decreased rate of outpatient exacerbation (HR 0.84; 95% CI 0.71-0.98) and significantly increased rates of COPD or pneumonia-related mortality (HR 1.42; 95% CI 1.11-1.81) and all-cause mortality (HR 1.29; 95% CI 1.15-1.44) (Table 5 in this section). Compared to controls, individuals receiving a new SNRI drug had significantly higher rate of all-cause mortality (HR 1.56; 95% CI 1.18-2.08). No other associations were statistically significant. Similar to community-dwelling individuals, new SSRI use was found to be associated with increased risk of death among long-term care home residents, but unlike the community-dwelling cohort, increased mortality risk additionally extended to new SNRI use in the long-term care home resident group.

**By citalopram daily dose category.** Compared to controls, individuals receiving lower daily doses of citalopram had significantly decreased rate of outpatient exacerbation (HR 0.68;

95% CI 0.52-0.88), but significantly increased rate of all-cause mortality (HR 1.22; 95% CI 1.02-1.46) (Table 6 in this section). Individuals receiving higher daily doses of citalopram versus controls also had significantly increased rate of all-cause mortality (HR 1.34; 95% CI 1.04-1.73). No other associations were statistically significant. Similar to the community-dwelling group, increased all-cause mortality was found to extend to lower dose citalopram users in the long-term care home resident cohort, but in addition, a dose-response relationship between citalopram and mortality was observed in the long-term care home group. Although there were a greater number of significantly increased adverse outcomes in association with lower dose citalopram use in the community-dwelling group, the smaller overall size of the long-term care home resident group, and the fact that more exposed individuals went unmatched in the latter cohort, may have contributed to an inability to detect more significant findings.

**With new benzodiazepine users serving as controls.** Compared to new benzodiazepine users, new SSRI/SNRI users had significantly decreased rates of COPD or pneumonia-related mortality (HR 0.61; 95% CI 0.48-0.78) and all-cause mortality (HR 0.63; 95% CI 0.57-0.71) (Table 7 in this section). No other outcomes were found to be statistically significant. A similar pattern of results was observed in the community-dwelling cohort.

**With new tricyclic antidepressant users serving as controls.** There were no significant associations observed between incident SSRI/SNRI drug use and our adverse respiratory outcomes, when new tricyclic antidepressant users formed the control group (Table 8 in this section). This sensitivity analysis may have been under-powered to detect potentially true

significant differences, given that in the relatively larger community-dwelling group significant differences were seen between exposed and control individuals.

**Figure 1. Flow diagram outlining exposed and control group identification in the long-term care home resident cohort**

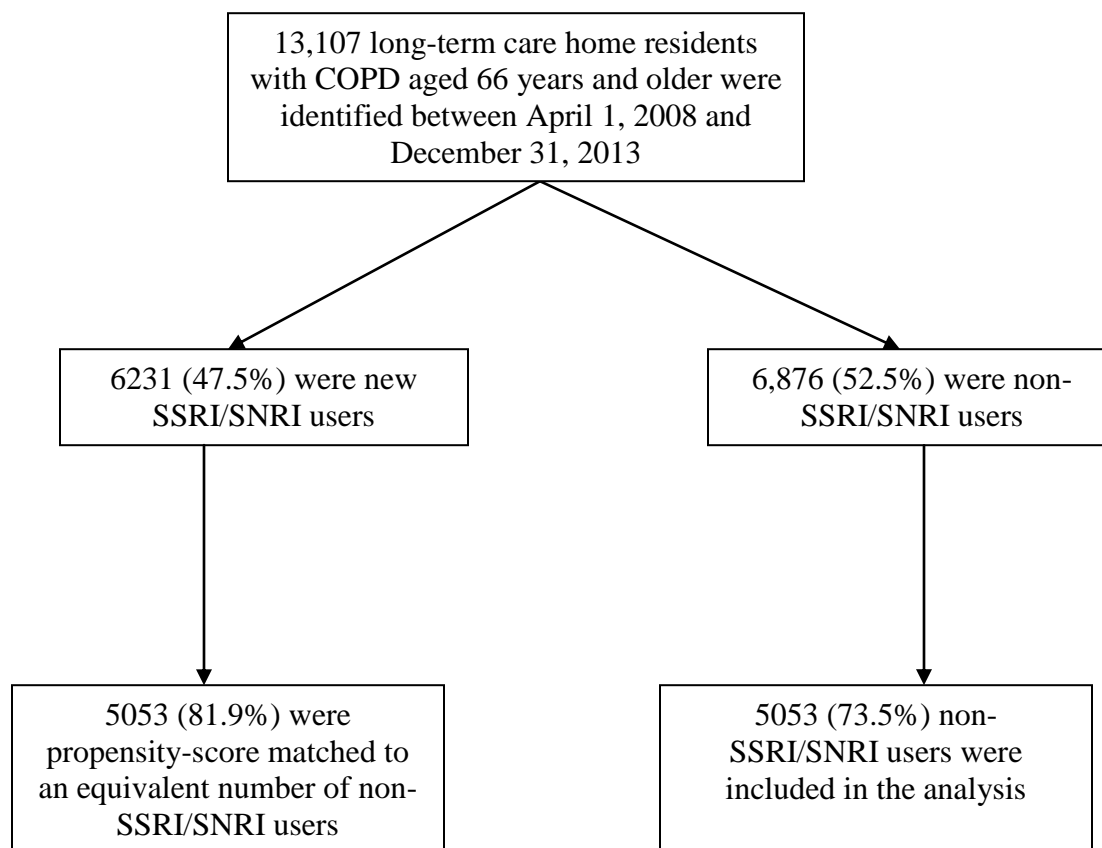

1 **Table 1. Baseline characteristics of long-term care home resident cohort, before and after**  
 2 **propensity score matching (full list of covariates included in the propensity score model)**

|                                                                 | Before propensity score matching |                            |                                         | After propensity score matching |                         |                                         |
|-----------------------------------------------------------------|----------------------------------|----------------------------|-----------------------------------------|---------------------------------|-------------------------|-----------------------------------------|
|                                                                 | New<br>SSRI/SNRI<br>users        | Non-SSRI/<br>SNRI<br>users | Standardized<br>difference <sup>a</sup> | New<br>SSRI/SNRI<br>users       | Non-SSRI/<br>SNRI users | Standardized<br>difference <sup>a</sup> |
|                                                                 | N=6,231                          | N=6,876                    |                                         | N=5,053                         | N=5,053                 |                                         |
| <b>Age (mean + SD)</b>                                          | 83.8 ± 7.1                       | 85.4 ± 7.5                 | 0.23                                    | 84.5 ± 6.9                      | 84.6 ± 7.6              | 0.01                                    |
|                                                                 |                                  |                            |                                         |                                 |                         |                                         |
| <b>% female</b>                                                 | 58.4%                            | 59.8%                      | 0.03                                    | 59.3%                           | 59.3%                   | 0.0008                                  |
|                                                                 |                                  |                            |                                         |                                 |                         |                                         |
| <b>Low income as per<br/>ODB flag (%)</b>                       | 37.6%                            | 40.2%                      | 0.05                                    | 38.7%                           | 39.1%                   | 0.009                                   |
|                                                                 |                                  |                            |                                         |                                 |                         |                                         |
| <b>Income quintile (%)</b>                                      |                                  |                            |                                         |                                 |                         |                                         |
| 1 (lowest)                                                      | 25.1%                            | 26.1%                      | 0.02                                    | 25.9%                           | 26.1%                   | 0.005                                   |
| 2                                                               | 20.4%                            | 19.4%                      | 0.02                                    | 19.8%                           | 20.6%                   | 0.02                                    |
| 3                                                               | 20.3%                            | 19.6%                      | 0.02                                    | 19.8%                           | 19.5%                   | 0.008                                   |
| 4                                                               | 18.1%                            | 17.7%                      | 0.01                                    | 18.0%                           | 17.8%                   | 0.005                                   |
| 5 (highest)                                                     | 15.3%                            | 16.3%                      | 0.03                                    | 15.8%                           | 15.3%                   | 0.01                                    |
| Missing data                                                    | 0.8%                             | 0.9%                       | 0.01                                    | 0.8%                            | 0.7%                    | 0.009                                   |
|                                                                 |                                  |                            |                                         |                                 |                         |                                         |
| <b>% rural setting</b>                                          | 18.7%                            | 15.8%                      | 0.08                                    | 17.4%                           | 17.4%                   | 0.0005                                  |
|                                                                 |                                  |                            |                                         |                                 |                         |                                         |
| <b>COPD exacerbation<br/>frequency in the past<br/>year (%)</b> |                                  |                            |                                         |                                 |                         |                                         |
| 0                                                               | 64.9%                            | 63.1%                      | 0.04                                    | 66.0%                           | 66.0%                   | 0                                       |
| >=1 outpatient<br>exacerbation                                  | 7.9%                             | 11.0%                      | 0.11                                    | 8.6%                            | 8.6%                    | 0                                       |
| >=1 exacerbation<br>requiring hospital<br>presentation          | 27.2%                            | 25.9%                      | 0.03                                    | 25.5%                           | 25.5%                   | 0                                       |
|                                                                 |                                  |                            |                                         |                                 |                         |                                         |
| <b>COPD exacerbation in<br/>the past 30 days (%)</b>            | 5.7%                             | 9.2%                       | 0.13                                    | 6.5%                            | 6.2%                    | 0.01                                    |
|                                                                 |                                  |                            |                                         |                                 |                         |                                         |
| <b>Duration of COPD<br/>year prior (%)</b>                      |                                  |                            |                                         |                                 |                         |                                         |
| < 2 years                                                       | 20.6%                            | 30.3%                      | 0.22                                    | 24.2%                           | 23.6%                   | 0.01                                    |
| 2-5 years                                                       | 17.2%                            | 17.1%                      | 0.003                                   | 17.5%                           | 17.6%                   | 0.001                                   |
| > 5 years                                                       | 62.2%                            | 52.7%                      | 0.19                                    | 58.3%                           | 58.9%                   | 0.01                                    |
|                                                                 |                                  |                            |                                         |                                 |                         |                                         |

| Table 1 continued from previous page                                       |                                  |                     |                                      |                                 |                     |                                      |
|----------------------------------------------------------------------------|----------------------------------|---------------------|--------------------------------------|---------------------------------|---------------------|--------------------------------------|
|                                                                            | Before propensity score matching |                     |                                      | After propensity score matching |                     |                                      |
|                                                                            | New SSRI/SNRI users              | Non-SSRI/SNRI users | Standardized difference <sup>a</sup> | New SSRI/SNRI users             | Non-SSRI/SNRI users | Standardized difference <sup>a</sup> |
|                                                                            | N=6,231                          | N=6,876             |                                      | N=5,053                         | N=5,053             |                                      |
| <b>Respiratory medications in the past 6 months (%)</b>                    |                                  |                     |                                      |                                 |                     |                                      |
| Short/long-acting beta agonists                                            | 37.3%                            | 39.9%               | 0.05                                 | 37.8%                           | 37.9%               | 0.002                                |
| Short/long-acting anticholinergics                                         | 38.4%                            | 41.0%               | 0.05                                 | 39.5%                           | 39.8%               | 0.006                                |
| Inhaled corticosteroids                                                    | 13.1%                            | 16.1%               | 0.08                                 | 14.2%                           | 14.3%               | 0.003                                |
| Combination inhaled corticosteroid-long acting beta agonist inhalers       | 27.3%                            | 26.1%               | 0.03                                 | 26.7%                           | 26.6%               | 0.002                                |
| Oral corticosteroids                                                       | 13.1%                            | 12.8%               | 0.009                                | 12.5%                           | 12.3%               | 0.008                                |
| Theophylline                                                               | 1.6%                             | 1.3%                | 0.02                                 | 1.6%                            | 1.4%                | 0.02                                 |
| Respiratory antibiotics                                                    | 48.7%                            | 55.5%               | 0.14                                 | 51.7%                           | 52.0%               | 0.006                                |
|                                                                            |                                  |                     |                                      |                                 |                     |                                      |
| <b>Total number of outpatient visits in the past 12 months (mean + SD)</b> | 18.9 ± 16.7                      | 18.7 ± 14.4         | 0.01                                 | 18.5 ± 15.9                     | 18.6 ± 14.1         | 0.005                                |
|                                                                            |                                  |                     |                                      |                                 |                     |                                      |
| <b>Total number of hospitalizations in the past 12 months (mean + SD)</b>  | 0.93 ± 1.17                      | 0.78 ± 1.09         | 0.1358                               | 0.84 ± 1.11                     | 0.83 ± 1.14         | 0.012                                |
|                                                                            |                                  |                     |                                      |                                 |                     |                                      |
| <b>Any ICU admission in the past 12 months (%)</b>                         | 602 (9.7%)                       | 494 (7.2%)          | 0.0893                               | 406 (8.0%)                      | 414 (8.2%)          | 0.0058                               |
|                                                                            |                                  |                     |                                      |                                 |                     |                                      |
| <b>Any surgery in the past 12 months (%)</b>                               | 700 (11.2%)                      | 584 (8.5%)          | 0.092                                | 481 (9.5%)                      | 485 (9.6%)          | 0.0027                               |
|                                                                            |                                  |                     |                                      |                                 |                     |                                      |
| <b>Johns Hopkins Adjusted Clinical Group<sup>b</sup> (%)</b>               |                                  |                     |                                      |                                 |                     |                                      |
| Bottom tertile                                                             | 29.3%                            | 40.3%               | 0.23                                 | 34.4%                           | 35.0%               | 0.01                                 |
| Middle tertile                                                             | 23.2%                            | 21.7%               | 0.04                                 | 23.4%                           | 22.9%               | 0.01                                 |
| Top tertile                                                                | 47.5%                            | 38.0%               | 0.19                                 | 42.2%                           | 42.1%               | 0.003                                |
|                                                                            |                                  |                     |                                      |                                 |                     |                                      |
| <b>Non-COPD pulmonary disease<sup>c</sup> (%)</b>                          | 42.5%                            | 38.0%               | 0.09                                 | 39.8%                           | 39.4%               | 0.009                                |
|                                                                            |                                  |                     |                                      |                                 |                     |                                      |
| <b>Ischemic heart disease<sup>c</sup> (%)</b>                              | 39.8%                            | 34.8%               | 0.10                                 | 37.7%                           | 37.7%               | 0.0004                               |



| Table 1 continued from previous page                                                                         |                                  |                            |                                         |                                 |                         |                                         |
|--------------------------------------------------------------------------------------------------------------|----------------------------------|----------------------------|-----------------------------------------|---------------------------------|-------------------------|-----------------------------------------|
|                                                                                                              | Before propensity score matching |                            |                                         | After propensity score matching |                         |                                         |
|                                                                                                              | New<br>SSRI/SNRI<br>users        | Non-SSRI/<br>SNRI<br>users | Standardized<br>difference <sup>a</sup> | New<br>SSRI/SNRI<br>users       | Non-SSRI/<br>SNRI users | Standardized<br>difference <sup>a</sup> |
|                                                                                                              | N=6,231                          | N=6,876                    |                                         | N=5,053                         | N=5,053                 |                                         |
| <b>Congestive heart failure<sup>c</sup> (%)</b>                                                              | 46.5%                            | 47.1%                      | 0.01                                    | 46.9%                           | 47.1%                   | 0.004                                   |
|                                                                                                              |                                  |                            |                                         |                                 |                         |                                         |
| <b>ER visit/hospitalization for ischemic heart disease or congestive heart failure in the year prior (%)</b> | 23.2%                            | 20.0%                      | 0.08                                    | 21.4%                           | 21.2%                   | 0.004                                   |
|                                                                                                              |                                  |                            |                                         |                                 |                         |                                         |
| <b>Hypertension<sup>c</sup> (%)</b>                                                                          | 84.9%                            | 81.7%                      | 0.09                                    | 83.7%                           | 83.6%                   | 0.003                                   |
|                                                                                                              |                                  |                            |                                         |                                 |                         |                                         |
| <b>Atherosclerosis<sup>c</sup> (%)</b>                                                                       | 8.4%                             | 8.4%                       | 0.0005                                  | 8.3%                            | 8.3%                    | 0.0007                                  |
|                                                                                                              |                                  |                            |                                         |                                 |                         |                                         |
| <b>Diabetes<sup>c</sup> (%)</b>                                                                              | 38.7%                            | 36.7%                      | 0.04                                    | 37.9%                           | 37.9%                   | 0.0004                                  |
|                                                                                                              |                                  |                            |                                         |                                 |                         |                                         |
| <b>Previous stroke and cerebrovascular disease<sup>c</sup> (%)</b>                                           | 31.3%                            | 29.1%                      | 0.045                                   | 30.2%                           | 30.5%                   | 0.007                                   |
|                                                                                                              |                                  |                            |                                         |                                 |                         |                                         |
| <b>Cancer<sup>c</sup> (%)</b>                                                                                | 22.5%                            | 21.8%                      | 0.02                                    | 22.2%                           | 22.0%                   | 0.005                                   |
|                                                                                                              |                                  |                            |                                         |                                 |                         |                                         |
| <b>Musculoskeletal or connective tissue disease<sup>c</sup> (%)</b>                                          | 92.8%                            | 91.2%                      | 0.06                                    | 92.1%                           | 92.1%                   | 0                                       |
|                                                                                                              |                                  |                            |                                         |                                 |                         |                                         |
| <b>Osteoporosis<sup>c</sup> (%)</b>                                                                          | 16.8%                            | 16.6%                      | 0.006                                   | 16.6%                           | 16.5%                   | 0.002                                   |
|                                                                                                              |                                  |                            |                                         |                                 |                         |                                         |
| <b>Psychotic psychiatric disease<sup>c,e</sup> (%)</b>                                                       | 21.9%                            | 19.8%                      | 0.05                                    | 21.1%                           | 21.4%                   | 0.007                                   |
|                                                                                                              |                                  |                            |                                         |                                 |                         |                                         |
| <b>Non-psychotic psychiatric disease<sup>c,f</sup> (%)</b>                                                   | 61.6%                            | 49.7%                      | 0.24                                    | 57.0%                           | 56.8%                   | 0.004                                   |
|                                                                                                              |                                  |                            |                                         |                                 |                         |                                         |
| <b>Sleep disorder<sup>c</sup> (%)</b>                                                                        | 53.2%                            | 48.4%                      | 0.10                                    | 50.4%                           | 50.8%                   | 0.008                                   |
|                                                                                                              |                                  |                            |                                         |                                 |                         |                                         |
| <b>Total number of non-SSRI/SNRI drugs received in the past year (mean + SD)</b>                             | 15.8 ± 8.0                       | 15.9 ± 6.9                 | 0.01                                    | 15.9 ± 7.8                      | 15.9 ± 7.0              | 0.001                                   |
|                                                                                                              |                                  |                            |                                         |                                 |                         |                                         |

Table 1 continued from previous page

|                                                                                                                                                                                                                                                         | Before propensity score matching |                            |                                         | After propensity score matching |                         |                                         |
|---------------------------------------------------------------------------------------------------------------------------------------------------------------------------------------------------------------------------------------------------------|----------------------------------|----------------------------|-----------------------------------------|---------------------------------|-------------------------|-----------------------------------------|
|                                                                                                                                                                                                                                                         | New<br>SSRI/SNRI<br>users        | Non-SSRI/<br>SNRI<br>users | Standardized<br>difference <sup>a</sup> | New<br>SSRI/SNRI<br>users       | Non-SSRI/<br>SNRI users | Standardized<br>difference <sup>a</sup> |
|                                                                                                                                                                                                                                                         | N=6,231                          | N=6,876                    |                                         | N=5,053                         | N=5,053                 |                                         |
| <b>Benzodiazepine in the<br/>past 6 months (%)</b>                                                                                                                                                                                                      | 32.5%                            | 28.9%                      | 0.08                                    | 31.2%                           | 31.7%                   | 0.01                                    |
|                                                                                                                                                                                                                                                         |                                  |                            |                                         |                                 |                         |                                         |
| <b>Oral/transdermal<br/>opioid in the past 6<br/>months (%)</b>                                                                                                                                                                                         | 34.2%                            | 29.8%                      | 0.09                                    | 32.7%                           | 32.6%)                  | 0.003                                   |
|                                                                                                                                                                                                                                                         |                                  |                            |                                         |                                 |                         |                                         |
| <b>Smoking cessation<br/>drug<sup>g</sup> in the past 12<br/>months (%)</b>                                                                                                                                                                             | 1.6%                             | 1.1%                       | 0.04                                    | 1.3%)                           | 1.3%)                   | 0.007                                   |
|                                                                                                                                                                                                                                                         |                                  |                            |                                         |                                 |                         |                                         |
| <b>Spirometry in the past<br/>12 months (%)</b>                                                                                                                                                                                                         | 8.0%                             | 5.1%                       | 0.12                                    | 6.1%                            | 6.0%)                   | 0.003                                   |
|                                                                                                                                                                                                                                                         |                                  |                            |                                         |                                 |                         |                                         |
| <b>% cohort entry in flu<br/>season<sup>h</sup></b>                                                                                                                                                                                                     | 39.1%                            | 33.8%                      | 0.11                                    | 36.5%                           | 36.3%                   | 0.005                                   |
| ER = emergency room; ODB = Ontario Drug Benefit; SD = standard deviation                                                                                                                                                                                |                                  |                            |                                         |                                 |                         |                                         |
| <sup>a</sup> Standardized differences of > 0.10 are thought to indicate potentially meaningful differences.                                                                                                                                             |                                  |                            |                                         |                                 |                         |                                         |
| <sup>b</sup> This is a measure of patient morbidity burden, using hospitalization and ambulatory visit data based on a 2-year look-back from the index date. The Johns Hopkins ACG(r) System Ver XX.                                                    |                                  |                            |                                         |                                 |                         |                                         |
| <sup>c</sup> Presence of comorbidities was based on 5-year look-back from the index date.                                                                                                                                                               |                                  |                            |                                         |                                 |                         |                                         |
| <sup>e</sup> Includes schizophrenia, bipolar disorder and paranoid states.                                                                                                                                                                              |                                  |                            |                                         |                                 |                         |                                         |
| <sup>f</sup> Includes depression disorders, anxiety disorders, phobias, stress disorders, dissociative and somatization disorders, eating disorders, personality disorders, mental and behavioural disorders due to substance abuse, and tic disorders. |                                  |                            |                                         |                                 |                         |                                         |
| <sup>g</sup> Includes Wellbutrin and Varenicline.                                                                                                                                                                                                       |                                  |                            |                                         |                                 |                         |                                         |
| <sup>h</sup> Defined as November 1 to March 31.                                                                                                                                                                                                         |                                  |                            |                                         |                                 |                         |                                         |

1  
2  
3  
4  
5  
6  
7  
8  
9  
10  
11  
12  
13  
14  
15

**Table 2. Hazard ratios and confidence intervals for outcomes in the propensity score matched long term care home resident cohort**

| Outcomes                                                            | Status of SSRI/SNRI use | Number of events (%) | HR (95% CI, p-value)      |
|---------------------------------------------------------------------|-------------------------|----------------------|---------------------------|
| <b>Outpatient respiratory exacerbation</b>                          | New SSRI or SNRI users  | 299(5.9%)            | 0.84 (0.72-0.97), 0.02    |
|                                                                     | Non- SSRI or SNRI users | 355(7.0%)            | Referent                  |
| <b>ER visit for COPD or pneumonia</b>                               | New SSRI or SNRI users  | 87(1.7%)             | 0.99 (0.74-1.33), 0.94    |
|                                                                     | Non- SSRI or SNRI users | 88(1.7%)             | Referent                  |
| <b>Hospital admissions COPD or pneumonia</b>                        | New SSRI or SNRI users  | 218(4.3%)            | 1.05 (0.88-1.27), 0.56    |
|                                                                     | Non- SSRI or SNRI users | 207(4.1%)            | Referent                  |
| <b>ICU admission during a hospitalization for COPD or pneumonia</b> | New SSRI or SNRI users  | 20(0.4%)             | 1.05 (0.56-1.98), 0.87    |
|                                                                     | Non- SSRI or SNRI users | 19(0.4%)             | Referent                  |
| <b>COPD/pneumonia-related mortality</b>                             | New SSRI or SNRI users  | 169(3.3%)            | 1.42 (1.13-1.80), 0.003   |
|                                                                     | Non- SSRI or SNRI users | 122(2.4%)            | Referent                  |
| <b>All-cause mortality</b>                                          | New SSRI or SNRI users  | 808(16.0%)           | 1.32 (1.19-1.46), <0.0001 |
|                                                                     | Non- SSRI or SNRI users | 631(12.5%)           | Referent                  |

CI = confidence interval; COPD = chronic obstructive pulmonary disease; ER = emergency room; HR = hazard ratio; ICU = intensive care unit

**Table 3. Hazard ratios and confidence intervals for outcomes in the propensity score matched long term care home resident cohort, stratified by COPD exacerbation frequency**

| COPD exacerbation frequency status                                                       | SSRI/SNRI status | Outpatient exacerbation |                        | ER visit for COPD or pneumonia |                        | Hospital admission COPD or pneumonia |                        | ICU admission during a hospitalization for COPD or pneumonia |                        | COPD or pneumonia-related mortality |                        | All-cause mortality |                          |
|------------------------------------------------------------------------------------------|------------------|-------------------------|------------------------|--------------------------------|------------------------|--------------------------------------|------------------------|--------------------------------------------------------------|------------------------|-------------------------------------|------------------------|---------------------|--------------------------|
|                                                                                          |                  | N (%)                   | HR (95% CI), p-value   | N (%)                          | HR (95% CI), p-value   | N (%)                                | HR (95% CI), p-value   | N (%)                                                        | HR (95% CI), p-value   | N (%)                               | HR (95% CI), p-value   | N (%)               | HR (95% CI), p-value     |
| <b>0 exacerbation in the year prior to index</b>                                         | New users        | 100 (3.0%)              | 0.75 (0.58-0.98), 0.03 | 48 (1.4%)                      | 1.23 (0.82-1.87), 0.32 | 88 (2.6%)                            | 1.13 (0.84-1.53), 0.43 | 6 (0.2%)                                                     | 1.00 (0.32-3.10), 1.00 | 70 (2.1%)                           | 1.43 (0.99-2.06), 0.05 | 462 (13.9%)         | 1.31 (1.14-1.50), 0.0001 |
|                                                                                          | Non-users        | 132 (4.0%)              |                        | 39 (1.2%)                      |                        | 78 (2.3%)                            |                        | 6 (0.2%)                                                     |                        | 50 (1.5%)                           |                        | 361 (10.8%)         |                          |
|                                                                                          |                  |                         |                        |                                |                        |                                      |                        |                                                              |                        |                                     |                        |                     |                          |
| <b>&gt;=1 outpatient respiratory exacerbation in the year prior to index</b>             | New users        | 72 (16.6%)              | 0.91 (0.67-1.23), 0.53 | 12 (2.8%)                      | 2.41 (0.84-6.90), 0.10 | 22 (5.1%)                            | 1.38 (0.74-2.58), 0.31 | <6 <sup>a</sup>                                              | 1.00 (0.14-7.12), 1.00 | 19 (4.4%)                           | 2.82 (1.18-6.77), 0.02 | 73 (16.8%)          | 1.96 (1.35-2.86), 0.0005 |
|                                                                                          | Non-users        | 78 (18.0%)              |                        | <6 <sup>a</sup>                |                        | 16 (3.7%)                            |                        | <6 <sup>a</sup>                                              |                        | 7 (1.6%)                            |                        | 39 (9.0%)           |                          |
|                                                                                          |                  |                         |                        |                                |                        |                                      |                        |                                                              |                        |                                     |                        |                     |                          |
| <b>&gt;=1 exacerbation requiring presentation to hospital in the year prior to index</b> | New users        | 127 (9.9%)              | 0.87 (0.69-1.10), 0.24 | 27 (2.1%)                      | 0.61 (0.38-0.99), 0.05 | 108 (8.4%)                           | 0.96 (0.73-1.24), 0.74 | 12 (0.9%)                                                    | 1.09 (0.48-2.49), 0.83 | 80 (6.2%)                           | 1.28 (0.92-1.77), 0.14 | 273 (21.2%)         | 1.23 (1.03-1.46), 0.02   |
|                                                                                          | Non-users        | 145 (11.3%)             |                        | 44 (3.4%)                      |                        | 113 (8.8%)                           |                        | 11 (0.9%)                                                    |                        | 65 (5.1%)                           |                        | 231 (18.0%)         |                          |
|                                                                                          |                  |                         |                        |                                |                        |                                      |                        |                                                              |                        |                                     |                        |                     |                          |

CI = confidence interval; COPD = chronic obstructive pulmonary disease; ER = emergency room; HR = hazard ratio; ICU = intensive care unit; N = number

<sup>a</sup>Data are not presented, according to Institute of Clinical Evaluative Sciences reporting rules, because of small cell size

**Table 4. Hazard ratios and confidence intervals for outcomes in the propensity score matched long term care home resident cohort, stratified by presence of pre-existing psychiatric disease**

| Pre-existing psychiatric disease <sup>a</sup> status | SSRI/ SNRI status | Outpatient exacerbation |                         | ER visit for COPD or pneumonia |                        | Hospital admission COPD or pneumonia |                        | ICU admission during a hospitalization for COPD or pneumonia |                        | COPD or pneumonia-related mortality |                         | All-cause mortality  |                           |
|------------------------------------------------------|-------------------|-------------------------|-------------------------|--------------------------------|------------------------|--------------------------------------|------------------------|--------------------------------------------------------------|------------------------|-------------------------------------|-------------------------|----------------------|---------------------------|
|                                                      |                   | N (%)                   | HR (95% CI), p-value    | N (%)                          | HR (95% CI), p-value   | N (%)                                | HR (95% CI), p-value   |                                                              | N (%)                  | HR (95% CI), p-value                | N (%)                   | HR (95% CI), p-value | N (%)                     |
| <b>No known pre-existing psychiatric disease</b>     | New users         | 105 (5.7%)              | 0.90 (0.70-1.16), 0.41  | 27 (1.5%)                      | 0.77 (0.46-1.28), 0.31 | 77 (4.1%)                            | 1.12 (0.82-1.53), 0.49 | 10 (0.5%)                                                    | 1.67 (0.61-4.60), 0.32 | 76 (4.1%)                           | 1.68 (1.17-2.42), 0.005 | 338(18.2%)           | 1.45 (1.24-1.71), <0.0001 |
|                                                      | Non-users         | 116 (6.2%)              |                         | 35 (1.9%)                      |                        | 69 (3.7%)                            |                        | 6 (0.3%)                                                     |                        | 47 (2.5%)                           |                         | 242(13.0%)           |                           |
|                                                      |                   |                         |                         |                                |                        |                                      |                        |                                                              |                        |                                     |                         |                      |                           |
| <b>Known pre-existing psychiatric disease</b>        | New users         | 194 (6.1%)              | 0.80 (0.67-0.97), 0.020 | 60 (1.9%)                      | 1.13 (0.79-1.64), 0.50 | 141 (4.4%)                           | 1.02 (0.81-1.29), 0.84 | 10 (0.3%)                                                    | 0.77 (0.34-1.76), 0.53 | 93 (2.9%)                           | 1.27 (0.94-1.71), 0.13  | 470(14.7%)           | 1.23 (1.08-1.41), 0.002   |
|                                                      | Non-users         | 239 (7.5%)              |                         | 53 (1.7%)                      |                        | 138 (4.3%)                           |                        | 13 (0.4%)                                                    |                        | 75 (2.3%)                           |                         | 389 (12.2%)          |                           |

CI = confidence interval; COPD = chronic obstructive pulmonary disease; ER = emergency room; HR = hazard ratio; ICU = intensive care unit; N = number

<sup>a</sup> An individual was considered to have psychiatric disease if any one of the following conditions were present: schizophrenia; bipolar disorder; paranoid states; depression disorders; anxiety disorders; phobias; stress disorders; dissociative and somatization disorders; eating disorders; personality disorders; mental and behavioural disorders due to substance abuse; and, tic disorders.

**Table 5. Hazard ratios and confidence intervals for outcomes in the long term care home resident propensity matched cohort, distinguishing by SSRI/SNRI drug class received**

| SSRI/SNRI drug class received | SSRI/SNRI status | Outpatient exacerbation |                        | ER visit for COPD or pneumonia |                        | Hospital admission COPD or pneumonia |                        | ICU admission during a hospitalization for COPD or pneumonia |                        | COPD or pneumonia-related mortality |                         | All-cause mortality |                           |
|-------------------------------|------------------|-------------------------|------------------------|--------------------------------|------------------------|--------------------------------------|------------------------|--------------------------------------------------------------|------------------------|-------------------------------------|-------------------------|---------------------|---------------------------|
|                               |                  | N (%)                   | HR (95% CI), p-value   | N (%)                          | HR (95% CI), p-value   | N (%)                                | HR (95% CI), p-value   | N (%)                                                        | HR (95% CI), p-value   | N (%)                               | HR (95% CI), p-value    | N (%)               | HR (95% CI), p-value      |
| SSRI drugs                    | New users        | 266 (6.1%)              | 0.84 (0.71-0.98), 0.03 | 81 (1.8%)                      | 1.03 (0.75-1.40), 0.87 | 185 (4.2%)                           | 1.02 (0.84-1.25), 0.83 | 17 (0.4%)                                                    | 1.13 (0.57-2.27), 0.72 | 152 (3.5%)                          | 1.42 (1.11-1.81), 0.005 | 698 (15.9%)         | 1.29 (1.15-1.44), <0.0001 |
|                               | Non-users        | 316 (7.2%)              |                        | 79 (1.8%)                      |                        | 181 (4.1%)                           |                        | 15 (0.3%)                                                    |                        | 110 (2.5%)                          |                         | 557 (12.7%)         |                           |
|                               |                  |                         |                        |                                |                        |                                      |                        |                                                              |                        |                                     |                         |                     |                           |
| SNRI drugs                    | New users        | 33 (5.0%)               | 0.84 (0.53-1.33), 0.45 | 6 (0.9%)                       | 0.66 (0.24-1.88), 0.44 | 33 (5.0%)                            | 1.28 (0.78-2.10), 0.33 | <6 <sup>a</sup>                                              | 0.75 (0.17-3.37), 0.71 | 18 (2.7%)                           | 1.57 (0.75-3.27), 0.23  | 111 (16.8%)         | 1.56 (1.18-2.08), 0.002   |
|                               | Non-users        | 39 (5.9%)               |                        | 9 (1.4%)                       |                        | 26 (3.9%)                            |                        | <6 <sup>a</sup>                                              |                        | 12 (1.8%)                           |                         | 74 (11.2%)          |                           |

CI = confidence interval; COPD = chronic obstructive pulmonary disease; ER = emergency room; HR = hazard ratio; ICU = intensive care unit; N = number

<sup>a</sup>Data are not presented, according to Institute of Clinical Evaluative Sciences reporting rules, because of small cell size

**Table 6. Hazard ratios and confidence intervals for outcomes in the long term care home resident propensity matched cohort, distinguishing by citalopram daily dose**

| Citalopram daily dose               | SSRI/SNRI status | Outpatient exacerbation |                         | ER visit for COPD or pneumonia |                        | Hospital admission COPD or pneumonia |                        | ICU admission during a hospitalization for COPD or pneumonia |                         | COPD or pneumonia-related mortality |                        | All-cause mortality |                        |
|-------------------------------------|------------------|-------------------------|-------------------------|--------------------------------|------------------------|--------------------------------------|------------------------|--------------------------------------------------------------|-------------------------|-------------------------------------|------------------------|---------------------|------------------------|
|                                     |                  | N (%)                   | HR (95% CI), p-value    | N (%)                          | HR (95% CI), p-value   | N (%)                                | HR (95% CI), p-value   | N (%)                                                        | HR (95% CI), p-value    | N (%)                               | HR (95% CI), p-value   | N (%)               | HR (95% CI), p-value   |
| <b>Lower dose (&lt; 20 mg/day)</b>  | New users        | 89 (5.7%)               | 0.68 (0.52-0.88), 0.004 | 33 (2.1%)                      | 1.38 (0.82-2.32), 0.23 | 67 (4.3%)                            | 1.23 (0.87-1.74), 0.25 | 6 (0.4%)                                                     | 1.00 (0.32-3.11), 1.00  | 49 (3.1%)                           | 1.39 (0.90-2.15), 0.14 | 245 (15.6%)         | 1.22 (1.02-1.46), 0.03 |
|                                     | Non-users        | 130 (8.3%)              |                         | 24 (1.5%)                      |                        | 55 (3.5%)                            |                        | 6 (0.4%)                                                     |                         | 36 (2.3%)                           |                        | 205 (13.1%)         |                        |
|                                     |                  |                         |                         |                                |                        |                                      |                        |                                                              |                         |                                     |                        |                     |                        |
| <b>Higher dose (&gt;=20 mg/day)</b> | New users        | 46 (5.3%)               | 0.86 (0.58-1.27), 0.45  | 11 (1.3%)                      | 0.73 (0.35-1.55), 0.42 | 34 (3.9%)                            | 0.89 (0.56-1.42), 0.62 | <6 <sup>a</sup>                                              | 3.00 (0.31-28.90), 0.34 | 23 (2.7%)                           | 1.13 (0.62-2.05), 0.70 | 136 (15.7%)         | 1.34 (1.04-1.73), 0.02 |
|                                     | Non-users        | 53 (6.1%)               |                         | 15 (1.7%)                      |                        | 38 (4.4%)                            |                        | <6 <sup>a</sup>                                              |                         | 21 (2.4%)                           |                        | 104 (12.0%)         |                        |

CI = confidence interval; COPD = chronic obstructive pulmonary disease; ER = emergency room; HR = hazard ratio; ICU = intensive care unit; N = number

<sup>a</sup>Data are not presented, according to Institute of Clinical Evaluative Sciences reporting rules, because of small cell size

**Table 7. Hazard ratios and confidence intervals for outcomes in the long term care home resident propensity matched cohort, where the control group was new benzodiazepine drug users**

| Outcomes                                                            | SSRI/SNRI use status     | Number of events (%) | HR (95% CI), p-value      |
|---------------------------------------------------------------------|--------------------------|----------------------|---------------------------|
| <b>Outpatient respiratory exacerbation</b>                          | New SSRI/SNRI users      | 188 (5.7%)           | 0.84 (0.70-1.02), 0.08    |
|                                                                     | New benzodiazepine users | 221 (6.7%)           | referent                  |
|                                                                     |                          |                      |                           |
| <b>ER visit for COPD or pneumonia</b>                               | New SSRI/SNRI users      | 63( 1.9%)            | 0.95 (0.67-1.35), 0.79    |
|                                                                     | New benzodiazepine users | 66 (2.0%)            | referent                  |
|                                                                     |                          |                      |                           |
| <b>Hospital admissions COPD or pneumonia</b>                        | New SSRI/SNRI users      | 153 (4.6%)           | 1.06 (0.85-1.33), 0.61    |
|                                                                     | New benzodiazepine users | 144 (4.4%)           | Referent                  |
|                                                                     |                          |                      |                           |
| <b>ICU admission during a hospitalization for COPD or pneumonia</b> | New SSRI/SNRI users      | 15 (0.5%)            | 0.75 (0.38-1.47), 0.40    |
|                                                                     | New benzodiazepine users | 20 (0.6%)            | referent                  |
|                                                                     |                          |                      |                           |
| <b>COPD or pneumonia-related mortality</b>                          | New SSRI/SNRI users      | 102 (3.1%)           | 0.61 (0.48-0.78), 0.0001  |
|                                                                     | New benzodiazepine users | 156 (4.7%)           | referent                  |
|                                                                     |                          |                      |                           |
| <b>All-cause mortality</b>                                          | New SSRI/SNRI users      | 534 (16.2%)          | 0.63 (0.57-0.71), <0.0001 |
|                                                                     | New benzodiazepine users | 783 (23.8%)          | referent                  |



**Table 8. Hazard ratios and confidence intervals for outcomes in the long-term care home resident propensity matched cohort, where the control group was tricyclic antidepressant drug users**

| Outcomes                                                            | Status of SSRI/SNRI use | Number of events (%) | HR (95% CI, p-value)   |
|---------------------------------------------------------------------|-------------------------|----------------------|------------------------|
| <b>Outpatient respiratory exacerbation</b>                          | New SSRI or SNRI users  | 333 (5.9%)           | 0.79 (0.55-1.14, 0.20) |
|                                                                     | New tricyclic users     | 48 (7.4%)            | referent               |
|                                                                     |                         |                      |                        |
| <b>ER visit for COPD or pneumonia</b>                               | New SSRI or SNRI users  | 98 (1.7%)            | 1.29 (0.61-2.75, 0.50) |
|                                                                     | New tricyclic users     | 9 (1.3%)             | referent               |
|                                                                     |                         |                      |                        |
| <b>Hospital admissions COPD or pneumonia</b>                        | New SSRI or SNRI users  | 258 (4.5%)           | 0.87 (0.59-1.29, 0.48) |
|                                                                     | New tricyclic users     | 34 (5.2%)            | referent               |
|                                                                     |                         |                      |                        |
| <b>ICU admission during a hospitalization for COPD or pneumonia</b> | New SSRI or SNRI users  | 30 (0.5%)            | 0.80 (0.34-1.90, 0.61) |
|                                                                     | New tricyclic users     | <6 <sup>a</sup>      | referent               |
|                                                                     |                         |                      |                        |
| <b>COPD or pneumonia-related mortality</b>                          | New SSRI or SNRI users  | 186 (3.3%)           | 1.07 (0.63-1.81, 0.81) |
|                                                                     | New tricyclic users     | 20 (3.1%)            | referent               |
|                                                                     |                         |                      |                        |
| <b>All-cause mortality</b>                                          | New SSRI or SNRI users  | 890 (15.7%)          | 1.04 (0.82-1.32, 0.74) |
|                                                                     | New tricyclic users     | 97 (15.0%)           | referent               |

<sup>a</sup> Data are not presented, according to Institute of Clinical Evaluative Sciences reporting rules, because of small cell size
